# Supplementary material for: Elucidating protonation pathways in CO2 photoreduction using the kinetic isotope effect
Source: PubMed Central journal article supplement (PMC10781958; doi:10.1038/s41467-024-44753-x), 2024-01-10
Supplement: 41467_2024_44753_MOESM1_ESM.pdf [file 41467_2024_44753_MOESM1_ESM.pdf]

# Supplementary Information

## Elucidating protonation pathways in CO<sub>2</sub> photoreduction using the kinetic isotope effect

Shikang Yin<sup>1</sup>, Yiying Zhou<sup>1</sup>, Zhonghuan Liu<sup>1</sup>, Huijie Wang<sup>1</sup>, Xiaoxue Zhao<sup>1</sup>, Zhi Zhu<sup>1</sup>, Yan Yan<sup>1\*</sup>, Pengwei Huo<sup>1\*</sup>

<sup>1</sup>Institute of Green Chemistry and Chemical Technology, School of Chemistry and Chemical Engineering, Jiangsu University, Zhenjiang 212013, PR China, E-mail: [dgy5212004@163.com](mailto:dgy5212004@163.com) and [huopw@ujs.edu.cn](mailto:huopw@ujs.edu.cn)

## Supplementary Figures

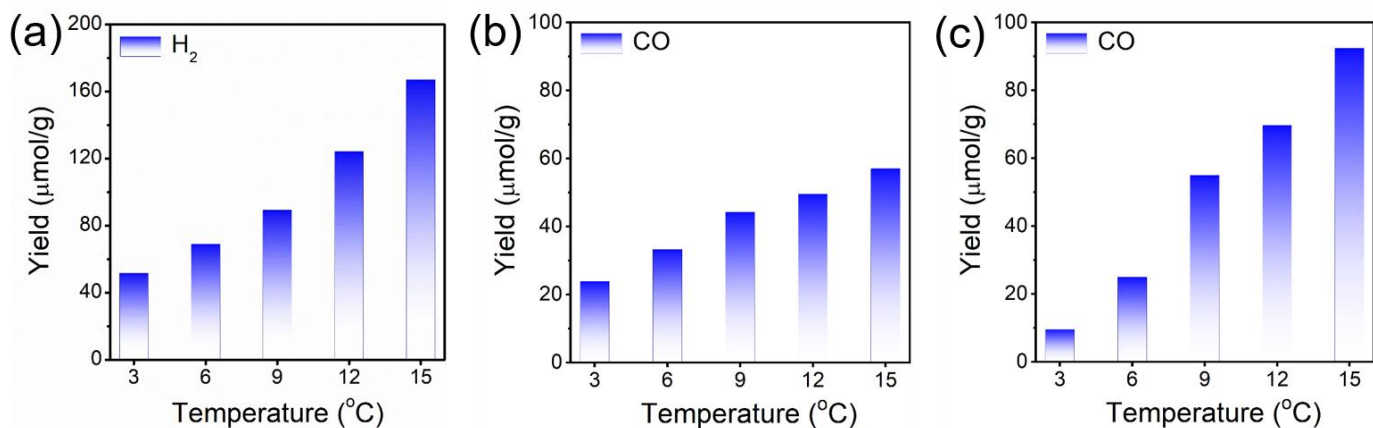

**Supplementary Figure 1. Comparison of the water-splitting and CO<sub>2</sub> reduction performances.** (a) The H<sub>2</sub> evolution for the water-splitting reaction run in 5 h using the TiO<sub>2</sub> photocatalyst at different temperatures (Pt was loaded as co-catalysts); (b) The CO evolution for the CO<sub>2</sub> reduction reaction run in 5 h using the TiO<sub>2</sub> photocatalyst at different temperatures (without Pt co-catalysts); (c) The CO evolution for the CO<sub>2</sub> reduction reaction run in 5 h using the Pt/TiO<sub>2</sub> photocatalyst at different temperatures (Pt was loaded as co-catalysts).

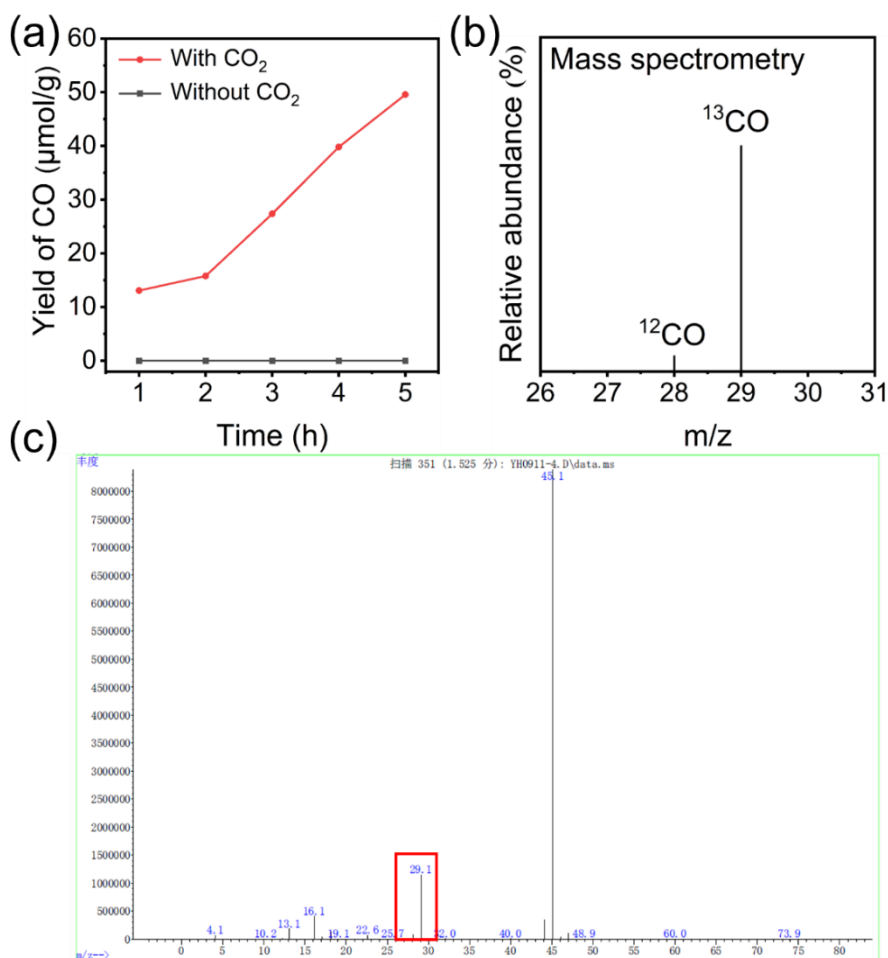

**Supplementary Figure 2. Characterization of sample performance and mass spectrometric.** (a) The comparison of CO

production rate with/without CO<sub>2</sub> on anatase TiO<sub>2</sub> catalyst (b) Mass spectrometry analyses of <sup>13</sup>CO (m/z =29) when using <sup>13</sup>CO<sub>2</sub> in the CO<sub>2</sub> photoreduction on the TiO<sub>2</sub> catalyst. (c) raw data report of the mass spectrum.

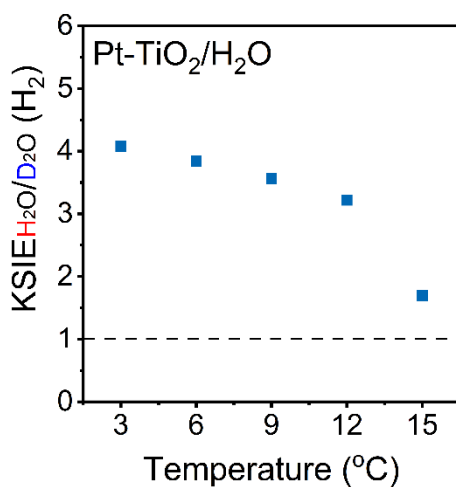

**Supplementary Figure 3. Control experiments show water-splitting KIE.** KSIE (H<sub>2</sub>) values obtained by comparing the H<sub>2</sub> production kinetics of the water-splitting reaction in the H<sub>2</sub>O/D<sub>2</sub>O systems at different temperatures (Pt was pre-deposited to exclude the influence of chloride ions).

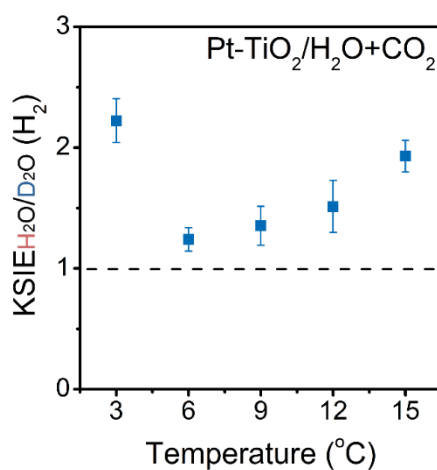

**Supplementary Figure 4. Control experiments show CO<sub>2</sub> reduction KIE.** KSIE (H<sub>2</sub>) values are given by comparing the kinetics of the CO<sub>2</sub> reduction reaction in the H/D system at different temperatures (Pt was loaded as co-catalysts, 3% chloroplatinic acid). Since the produced hydrogen will continue to participate in the subsequent CO<sub>2</sub> reduction process, its kinetic curve is greatly affected by the CO<sub>2</sub> reduction reaction, but it still shows a KSIE greater than 1 under different temperature conditions.

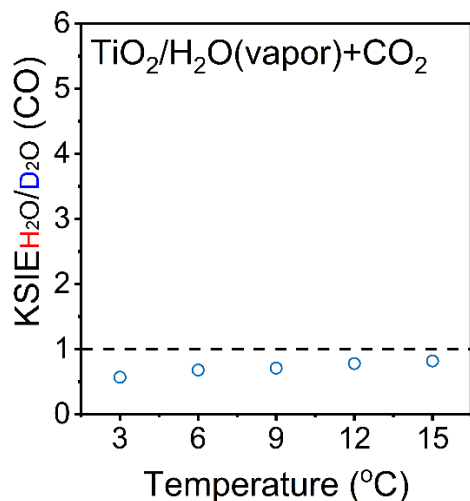

**Supplementary Figure 5. Control experiments show the effect of water vapor.** KSIE (CO) values are given by comparing the kinetics of the CO<sub>2</sub> reduction reaction on anatase TiO<sub>2</sub> catalyst with H<sub>2</sub>O/D<sub>2</sub>O in the vapor state at different temperatures.

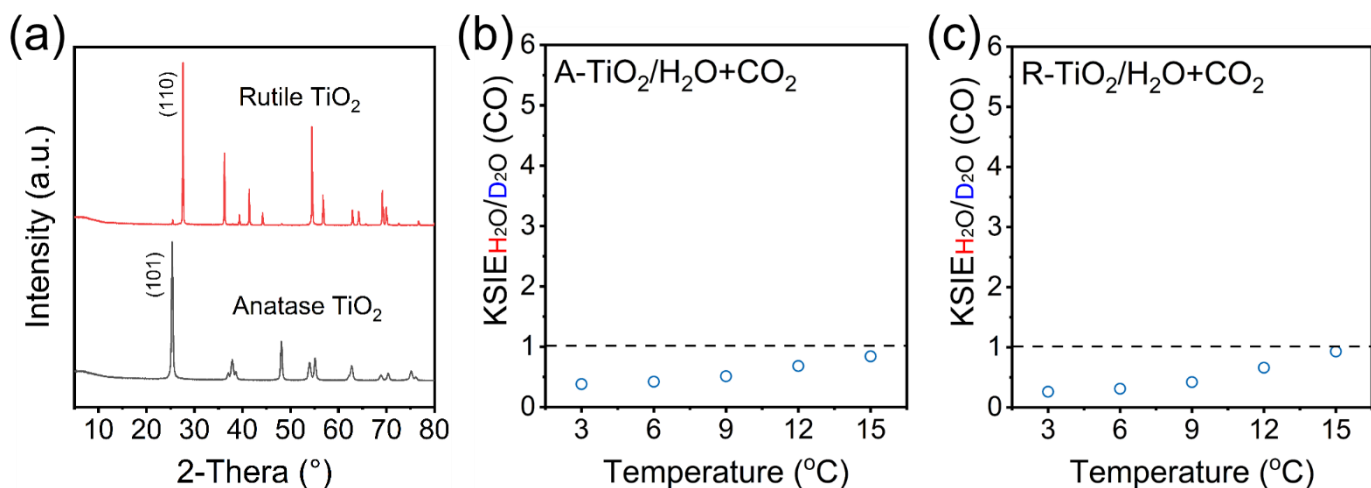

**Supplementary Figure 6. Comparison of sample crystalline structure and KIE.** (a) XRD patterns of rutile and anatase TiO<sub>2</sub>; (b, c) KSIE (CO) values on anatase and rutile TiO<sub>2</sub> catalysts in the H<sub>2</sub>O/D<sub>2</sub>O systems at different temperatures.

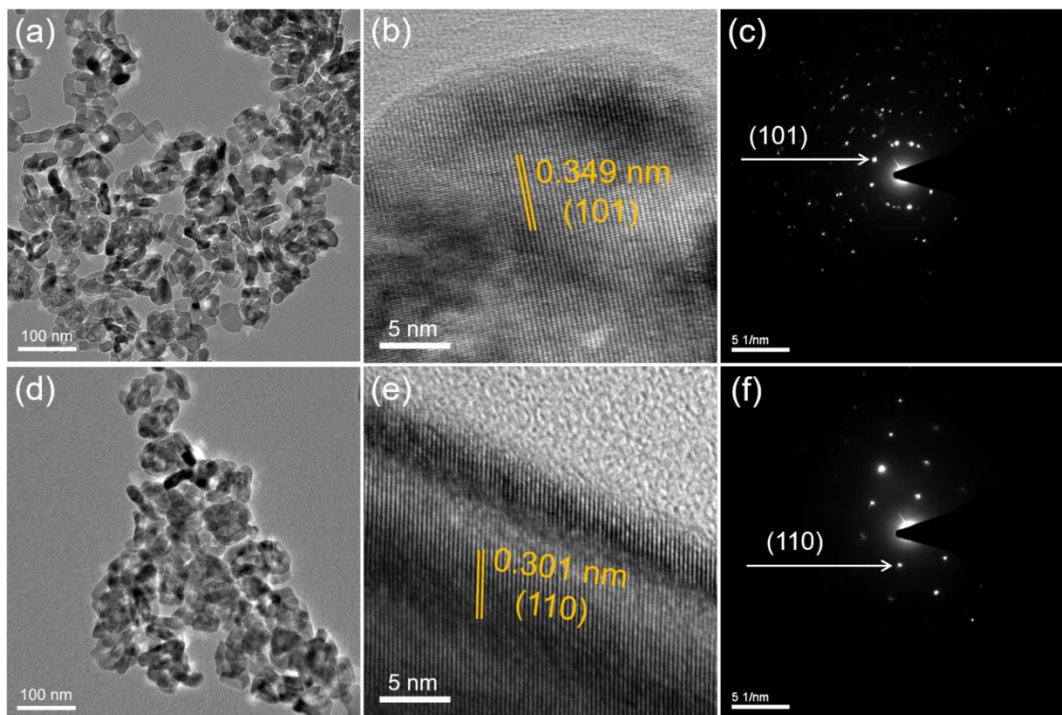

**Supplementary Figure 7. Comparison of sample morphologies.** (a, b, c) TEM/HR-TEM images and SAED pattern of the anatase TiO<sub>2</sub> catalyst; (d, e, f) TEM/HR-TEM images and SAED pattern of the rutile TiO<sub>2</sub> catalyst.

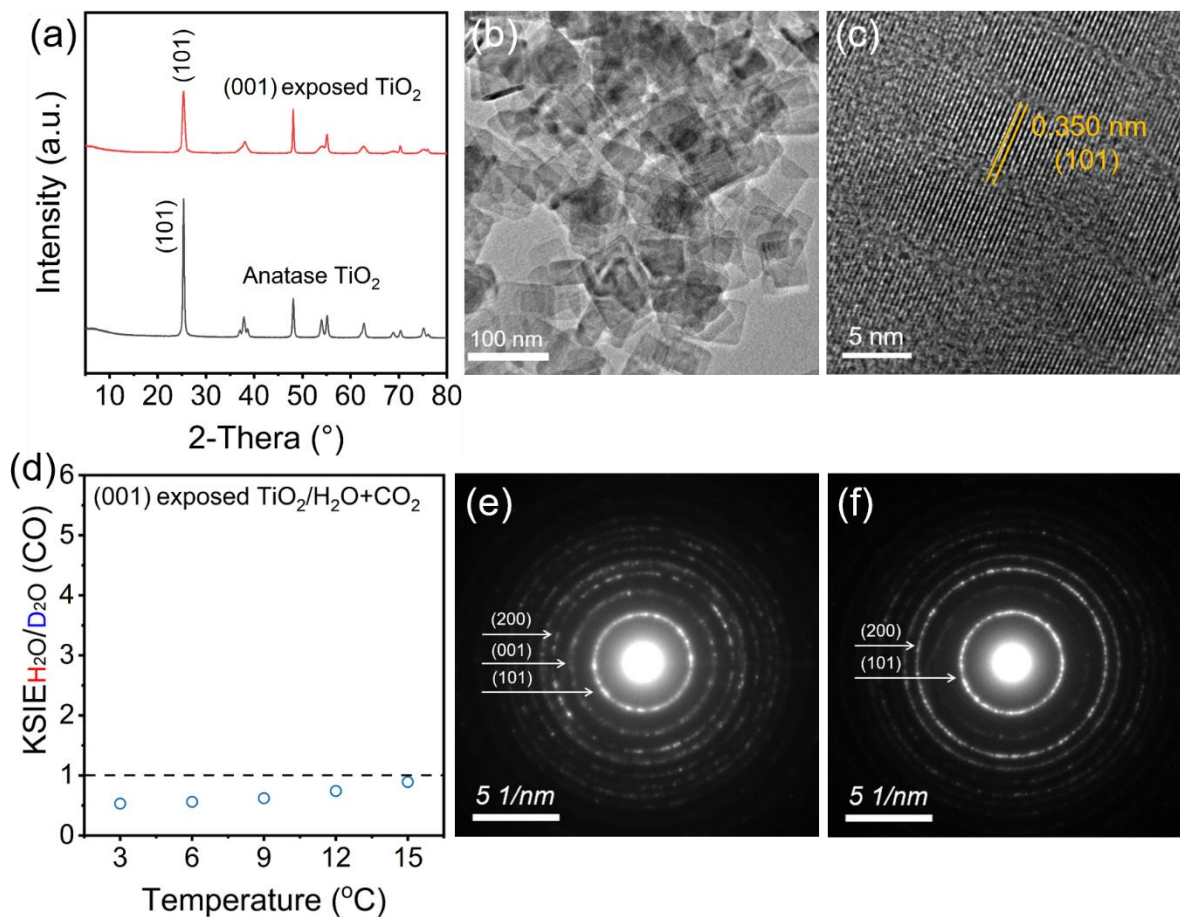

**Supplementary Figure 8. Comparison of sample crystal planes.** (a) XRD patterns of the (001) facet exposed TiO<sub>2</sub> nanosheet catalyst and the normal anatase TiO<sub>2</sub> catalyst; (b, c) TEM and HR-TEM images of the (001) exposed TiO<sub>2</sub> nanosheet; (d) KSIE (CO) values on {001} facet exposed TiO<sub>2</sub> nanosheet catalyst in the H<sub>2</sub>O/D<sub>2</sub>O systems at different temperatures; (e) SAED pattern of the normal anatase TiO<sub>2</sub> catalyst; (f) SAED pattern of the the (001) facet exposed TiO<sub>2</sub> catalyst.

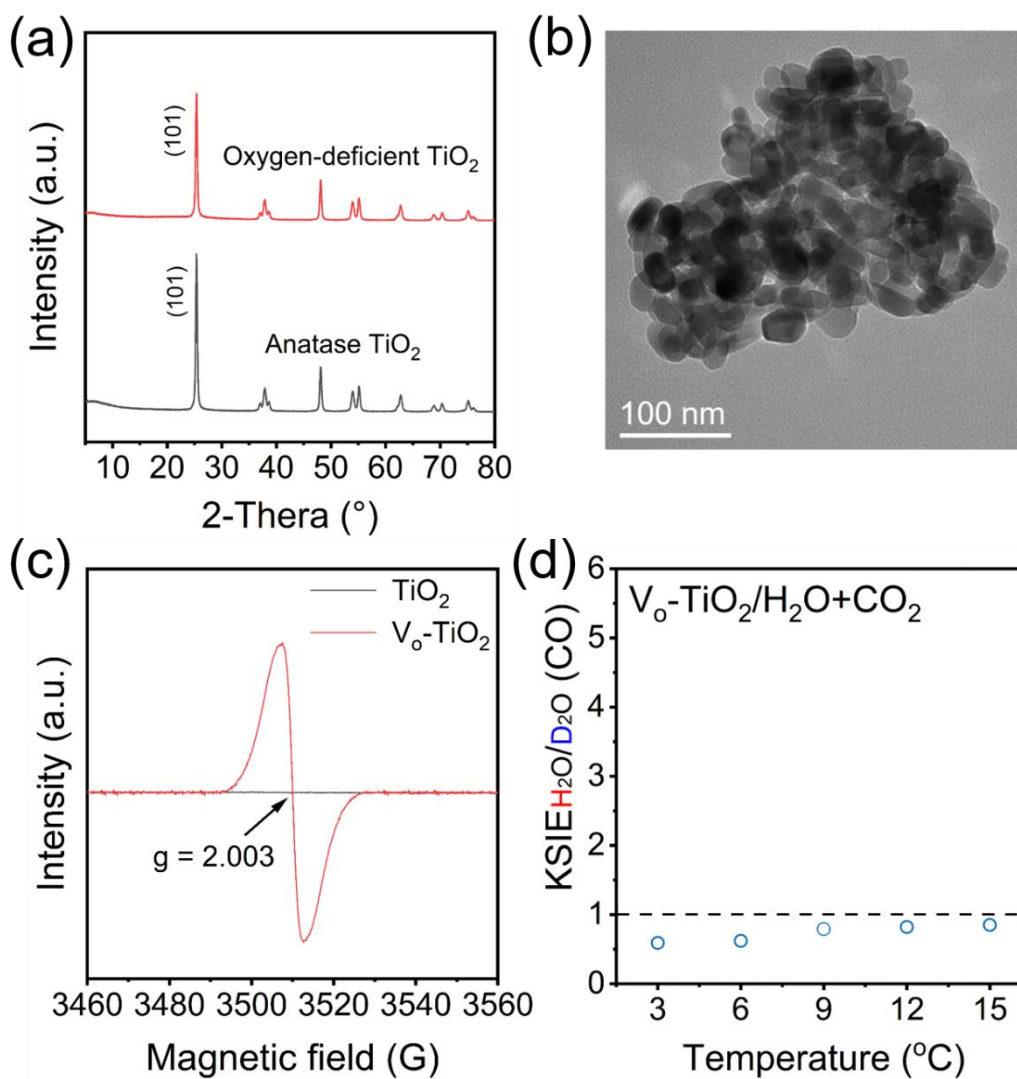

**Supplementary Figure 9. Control experiments show the effect of oxygen-deficient.** (a) XRD patterns of oxygen-deficient TiO<sub>2</sub> (Vo-TiO<sub>2</sub>) and normal anatase TiO<sub>2</sub> catalysts; (b) TEM image of the oxygen-deficient TiO<sub>2</sub> (Vo-TiO<sub>2</sub>) catalyst; (c) EPR spectra of oxygen-deficient TiO<sub>2</sub> (Vo-TiO<sub>2</sub>) and normal anatase TiO<sub>2</sub> catalysts; (d) KSIE (CO) values of the CO<sub>2</sub> reduction reaction on the oxygen-deficient TiO<sub>2</sub> catalyst (Vo-TiO<sub>2</sub>) in the H<sub>2</sub>O/D<sub>2</sub>O systems at different temperatures.

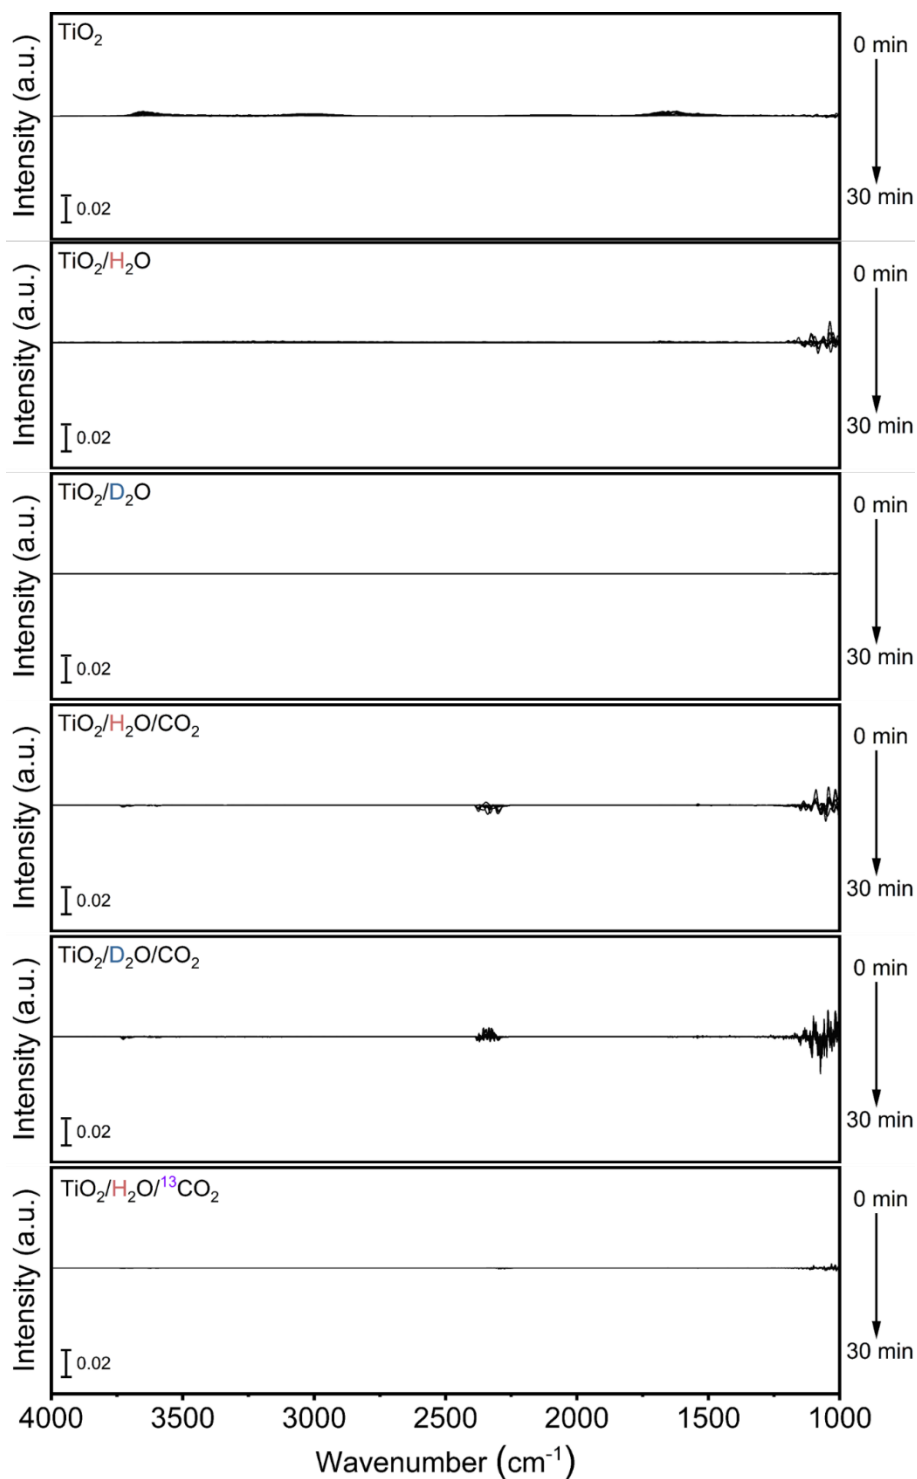

**Supplementary Figure 10. Control experiments show infrared absorption spectra under dark reaction. In-situ DRIFTS spectra collected at the  $\text{TiO}_2$ ,  $\text{TiO}_2/\text{H}_2\text{O}$ ,  $\text{TiO}_2/\text{D}_2\text{O}$ ,  $\text{TiO}_2/\text{H}_2\text{O}/\text{CO}_2$ ,  $\text{TiO}_2/\text{D}_2\text{O}/\text{CO}_2$  and  $\text{TiO}_2/\text{H}_2\text{O}/^{13}\text{CO}_2$  interfaces in the dark within 30 min.**



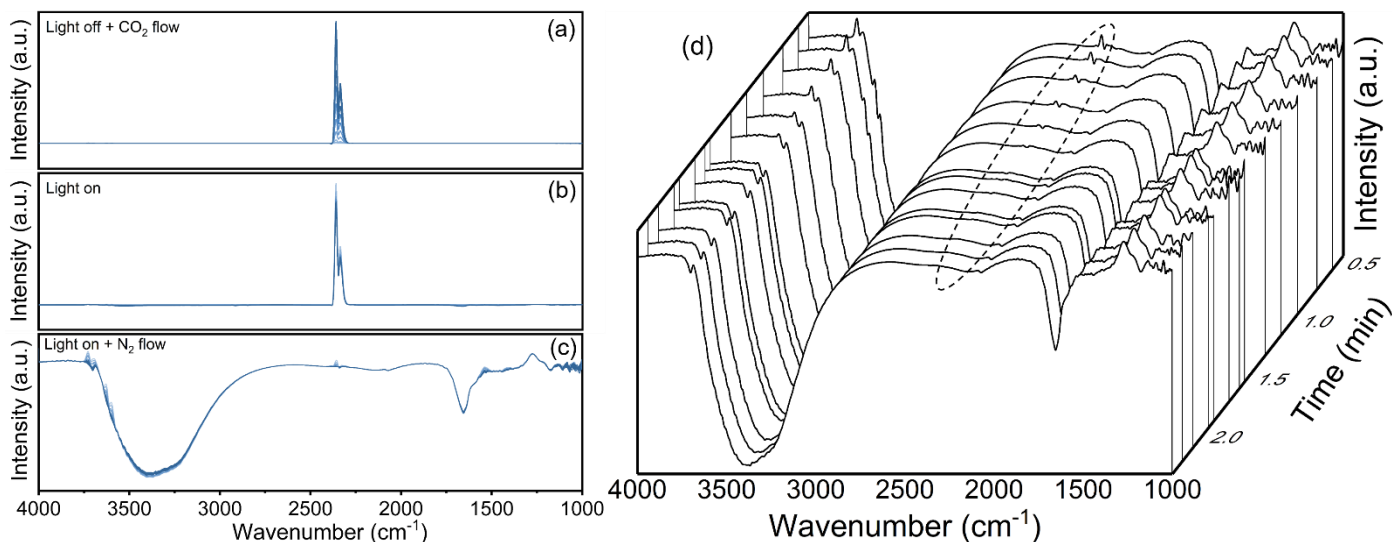

**Supplementary Figure 11. Control experiments show infrared absorption spectra under different conditions.** (a) In-situ DRIFTS spectra taking with the bare TiO<sub>2</sub> surface (in N<sub>2</sub> flow) as the background then CO<sub>2</sub> was introduced into the system in the dark for 15 min. (b) After 15 min in the dark, the identical system of (a) was then illuminated by a 365 nm (3W) LED lamp for 10 min. (c) during the continuous 365 nm (3W, LED) irradiation, an abrupt removal of the CO<sub>2</sub> gas-phase by the N<sub>2</sub> flow was conducted. (d) Waterfall profiles of the in-situ DRIFTS spectra after the abrupt CO<sub>2</sub> gas-phase removal. Surface CO<sub>2</sub> species faded out in 1 min.

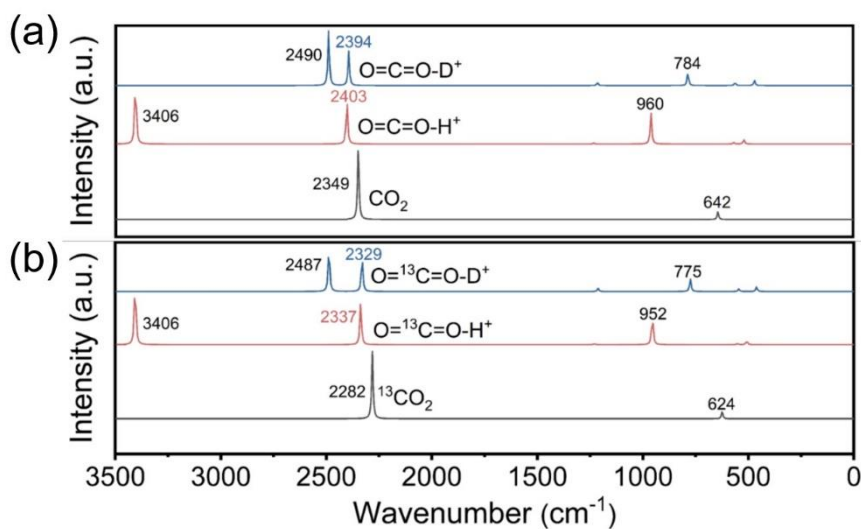

**Supplementary Figure 12. Quantum chemical calculations.** (a) Quantum chemical calculation of the infrared spectra of CO<sub>2</sub>, O=C=O-H<sup>+</sup> and O=C=O-D<sup>+</sup>; (b) Quantum chemical calculation of the infrared spectra of <sup>13</sup>CO<sub>2</sub>, O=<sup>13</sup>C=O-H<sup>+</sup> and O=<sup>13</sup>C=O-D<sup>+</sup>.

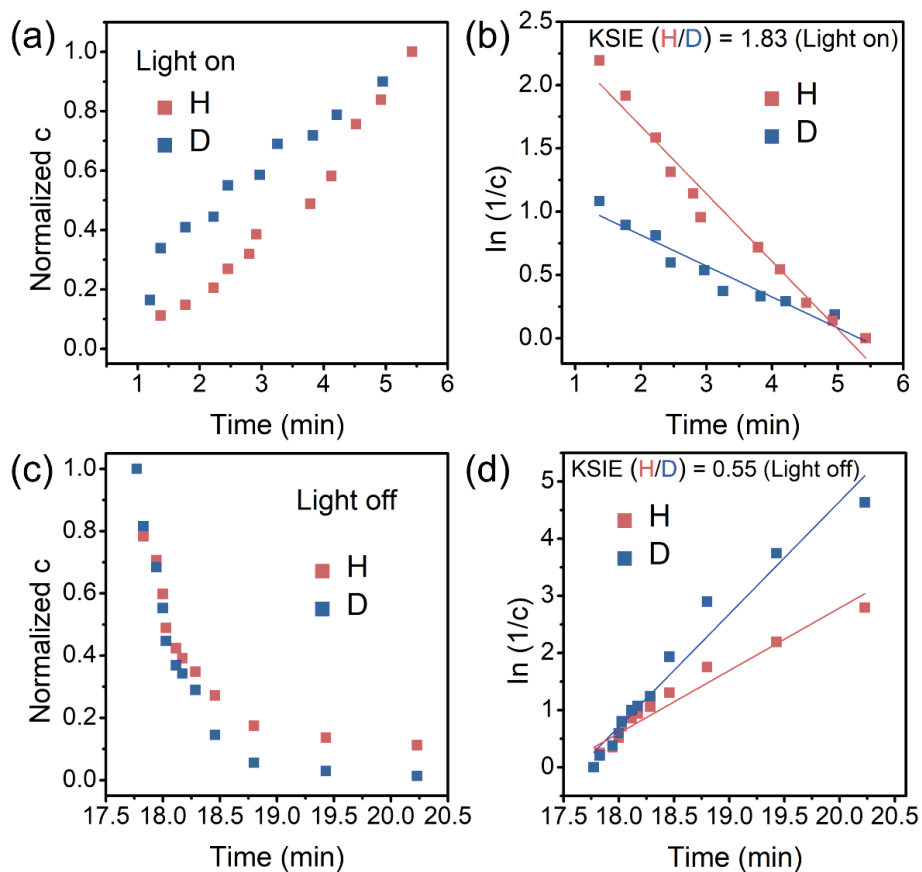

**Supplementary Figure 13. Control experiments show fitted data for IR.** (a, b) KSIE value was given by comparing the rising signals of protonated intermediates ( $\text{O}=\text{C}=\text{O}-\text{H}^+/\text{D}^+$ ) in the H/D systems, light-on; (c, d) KSIE value was given by comparing the decay signals protonated intermediates ( $\text{O}=\text{C}=\text{O}-\text{H}^+/\text{D}^+$ ) in the H/D systems, light off.

## Supplementary Tables

**Supplementary Table 1** Assignment of CO<sub>2</sub>, O=C=O-H<sup>+</sup>/D<sup>+</sup>, O=<sup>13</sup>C=O-H<sup>+</sup>/D<sup>+</sup> infrared spectral vibrational modes by quantum chemical calculations.

|                                     | Wavelength (cm <sup>-1</sup> ) | Vibration mode                                                  |
|-------------------------------------|--------------------------------|-----------------------------------------------------------------|
| CO <sub>2</sub>                     | 642                            | O=C=O bending vibration                                         |
|                                     | 2349                           | O=C=O asymmetric stretching vibration                           |
| O=C=O-H <sup>+</sup>                | 960                            | C=O-H bending vibration                                         |
|                                     | 2403                           | O=C=O asymmetric stretching vibration, C-H stretching vibration |
|                                     | 3406                           | O-H stretching vibration                                        |
| O=C=O-D <sup>+</sup>                | 469                            | O=C=O bending vibration, C-D bending vibration                  |
|                                     | 561                            | O=C=O bending vibration                                         |
|                                     | 784                            | C=O-D bending vibration                                         |
|                                     | 1214                           | O=C=O symmetric stretching vibration                            |
|                                     | 2394                           | O=C=O asymmetric stretching vibration, C-D stretching vibration |
|                                     | 2490                           | O-D stretching vibration                                        |
| <sup>13</sup> CO <sub>2</sub>       | 624                            | O=C=O bending vibration                                         |
|                                     | 2282                           | O=C=O asymmetric stretching vibration                           |
| O= <sup>13</sup> C=O-H <sup>+</sup> | 952                            | C=O-H bending vibration                                         |
|                                     | 2337                           | O=C=O asymmetric stretching vibration, C-H stretching vibration |
|                                     | 3406                           | O-H stretching vibration                                        |
| O= <sup>13</sup> C=O-D <sup>+</sup> | 461                            | O=C=O bending vibration, C-D bending vibration                  |
|                                     | 545                            | O=C=O bending vibration                                         |
|                                     | 775                            | C=O-D bending vibration                                         |
|                                     | 1212                           | O=C=O symmetric stretching vibration                            |
|                                     | 2329                           | O=C=O asymmetric stretching vibration, C-D stretching vibration |
|                                     | 2487                           | O-D stretching vibration                                        |
